# Supplementary material
Source: MDPI journal article supplement (https://www.mdpi.com/2076-3417/12/9/4602)
Supplement: s1 [file s1 › applsci-1648666-supplementary.pdf]

**Table S1.** A scenario of the in-depth interviews with 20 selected fishery managers performed in the region of Bohemia from January 2021 to January 2022. The questions for the interviews were prepared based on scientific literature that describes management of streams with trout populations [1–9]. The topic for the interviews was always fishery management of salmonid streams that can hold sustainable self-reproducing native wild brown trout populations.

---

Questions for the fishery managers

- 1) Can you list the fishery management adjustments that helped you to hold a sustainable self-reproducing native wild brown trout population in your streams?
  - 2) Which fishery management adjustment did not work for you? And can you tell us why they did not work?
  - 3) What do you think fisheries managers should do to help the brown trout populations in their streams?
  - 4) What are the main threats to brown trout populations in your streams and in central Europe in general?
  - 5) What kind of protection measures should be taken to conserve local brown trout populations?
  - 6) What kinds of fishing regulations are currently effective on your streams? And what new regulations would you recommend?
- 

## References

1. Jutila, E.; Ahvonen, A.; Julkunen, M. Instream and catchment characteristics affecting the occurrence and population density of brown trout, *Salmo trutta* L., in forest brooks of a boreal river basin. *Fish. Manag. Ecol.* **2001**, *8*, 501–511.
2. Rasmussen, G.H. Research activities and management of brown trout and sea trout (*Salmo trutta* L.) in Denmark. In *Sea Trout: Biology, Conservation and Management*; Wiley: Hoboken, NJ, USA, 2001; pp. 342.
3. Hansen, M.M.; Ruzzante, D.E.; Nielsen, E.E.; Bekkevold, D.; Mensberg, K.L.D. Long-term effective population sizes, temporal stability of genetic composition and potential for local adaptation in anadromous brown trout (*Salmo trutta*) populations. *Mol. Ecol.* **2002**, *11*, 2523–2535.
4. Almodóvar, A.; Nicola, G.G. Angling impact on conservation of Spanish stream-dwelling brown trout *Salmo trutta*. *Fish. Manag. Ecol.* **2004**, *11*, 173–182.
5. Vehanen, T.; Huusko, A.; Mäki-Petäys, A.; Louhi, P.; Mykrä, H.; Muotka, T. APPLIED ISSUES: Effects of habitat rehabilitation on brown trout (*Salmo trutta*) in boreal forest streams. *Freshw. Biol.* **2010**, *55*, 2200–2214.
6. Lyach, R. The effects of fisheries management on harvest rates of native and non-native salmonid fish species. *J. Appl. Ichthyol.* **2020**, *36*, 298–314.
7. Caudron, A.; Champigneulle, A.; Guyomard, R.; Largiadèr, C.R. Assessment of three strategies practiced by fishery managers for restoring native brown trout (*Salmo trutta*) populations in Northern French Alpine Streams. *Ecol. Freshw. Fish* **2011**, *20*, 478–491.

8. Lobón-cerviá, J. Why, when and how do fish populations decline, collapse and recover? The example of brown trout (*Salmo trutta*) in Rio Chaballos (northwestern Spain). *Freshw. Biol.* **2009**, *54*, 1149–1162.
9. Pinter, K.; Weiss, S.; Lautsch, E.; Unfer, G. Survival and growth of hatchery and wild brown trout (*Salmo trutta*) parr in three Austrian headwater streams. *Ecol. Freshw. Fish* **2018**, *27*, 146–157.
